# Supplementary material for: Caloric restriction mitigates age-associated senescence characteristics in subcutaneous adipose tissue-derived stem cells
Source: publisher site journal article supplement (doi:10.18632/aging.205812), 2024-05-09
Supplement: Supplementary file [file aging-v16i9-205812-supplementary-material-SD1.pdf]

**SUPPLEMENTARY FIGURE**

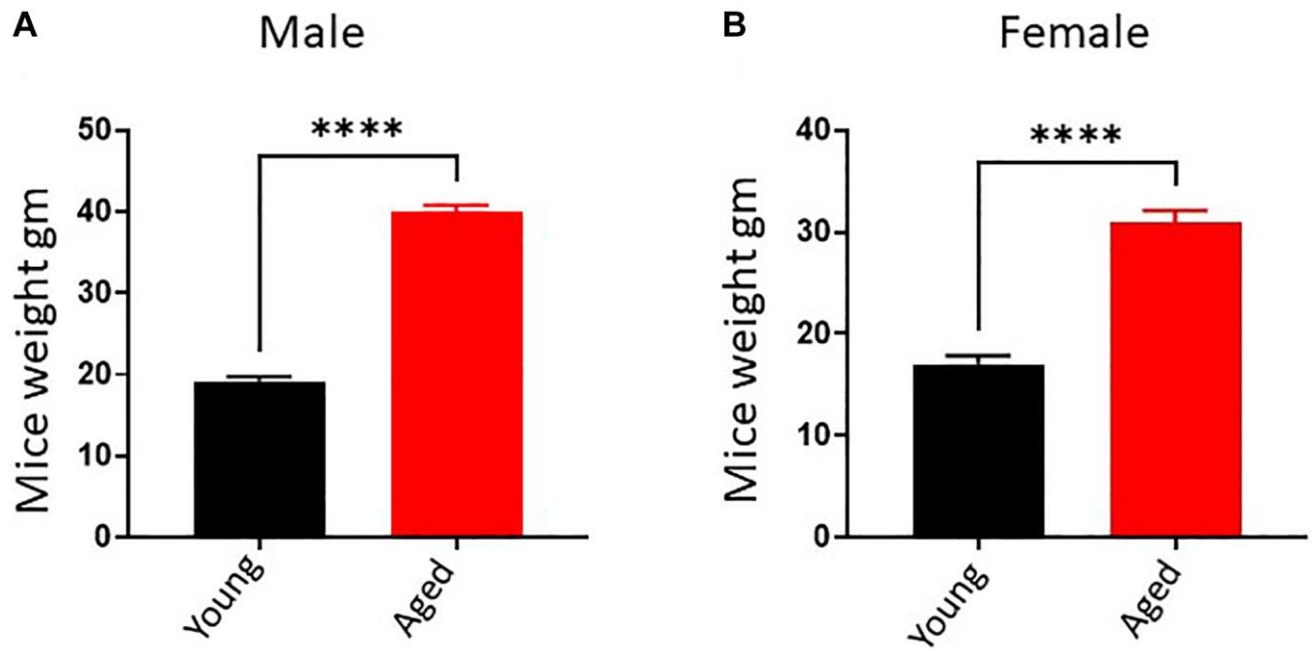

**Supplementary Figure 1.** Weight of young and aged male (A) and female (B) mice.  $P$ -value  $< 0.00005 = ****$ .
